# Supplementary material
Source: HighWire-hosted journal article supplement (https://bmjopen.bmj.com/content/9/8/e031238)
Supplement: inline-supplementary-material-3 [file inline-supplementary-material-3.pdf]

### Examining the predictive accuracy of metabolomics for small for gestational age babies: a systematic review

Debora F. B. Leite & Aude-Claire Morillon, Elias F. Melo Júnior, Renato T. Souza, Fergus P. McCarthy, Ali S. Khashan, Philip N. Baker, Louise C. Kenny, José Guilherme Cecatti.

Supplementary material 3 - Individual QUADAS-2 data for all 15 included studies.

| Studies                    | Risk of bias                                             |                                               |                                                                                                     |                                                |                                                                              |                                                                                                     |                                                       |                                             |
|----------------------------|----------------------------------------------------------|-----------------------------------------------|-----------------------------------------------------------------------------------------------------|------------------------------------------------|------------------------------------------------------------------------------|-----------------------------------------------------------------------------------------------------|-------------------------------------------------------|---------------------------------------------|
|                            | Patient selection                                        |                                               | Index test                                                                                          |                                                | Reference standard                                                           |                                                                                                     | Flow and timing                                       |                                             |
|                            | Was a consecutive or random sample of patients enrolled? | Did the study avoid inappropriate exclusions? | Were the index test results interpreted without knowledge of the results of the reference standard? | If a threshold was used, was it pre-specified? | Is the reference standard likely to correctly classify the target condition? | Were the reference standard results interpreted without knowledge of the results of the index test? | Did all patients receive the same reference standard? | Were all patients included in the analysis? |
| Grandone E et al, 2006     | Yes                                                      | Yes                                           | Unclear                                                                                             | No                                             | No                                                                           | Unclear                                                                                             | Yes                                                   | Yes                                         |
| van Eijdsen M et al, 2008  | Yes                                                      | Yes                                           | No                                                                                                  | No                                             | Yes                                                                          | Yes                                                                                                 | Yes                                                   | Yes                                         |
| Horgan R et al, 2011       | Yes                                                      | Yes                                           | No                                                                                                  | Yes                                            | Yes                                                                          | Yes                                                                                                 | Yes                                                   | Yes                                         |
| Costet N et al, 2012       | Yes                                                      | Yes                                           | Yes                                                                                                 | No                                             | Yes                                                                          | Unclear                                                                                             | Yes                                                   | No                                          |
| Ertl R et al, 2012         | Yes                                                      | Yes                                           | No                                                                                                  | Yes                                            | Yes                                                                          | Yes                                                                                                 | Yes                                                   | Yes                                         |
| Gernand AD et al, 2013     | Yes                                                      | Yes                                           | No                                                                                                  | Yes                                            | Yes                                                                          | Yes                                                                                                 | Yes                                                   | Yes                                         |
| Sulek K et al, 2014        | Yes                                                      | Yes                                           | No                                                                                                  | Yes                                            | Unclear                                                                      | Unclear                                                                                             | Yes                                                   | Yes                                         |
| Choi R et al, 2016         | Yes                                                      | Yes                                           | Unclear                                                                                             | Yes                                            | Yes                                                                          | Unclear                                                                                             | Yes                                                   | Yes                                         |
| Kiely ME et al, 2016       | Yes                                                      | Yes                                           | No                                                                                                  | Yes                                            | Yes                                                                          | Yes                                                                                                 | Yes                                                   | Yes                                         |
| Ong YL et al, 2016         | Yes                                                      | Yes                                           | No                                                                                                  | Yes                                            | Yes                                                                          | Yes                                                                                                 | Yes                                                   | No                                          |
| Wang Y et al, 2016         | Yes                                                      | Yes                                           | No                                                                                                  | No                                             | Yes                                                                          | Yes                                                                                                 | Yes                                                   | Yes                                         |
| Delplancke TDJ et al, 2018 | Yes                                                      | Yes                                           | No                                                                                                  | Yes                                            | Yes                                                                          | Unclear                                                                                             | Yes                                                   | Yes                                         |
| Luthra G et al, 2018       | Yes                                                      | Yes                                           | No                                                                                                  | No                                             | Yes                                                                          | Yes                                                                                                 | Yes                                                   | Yes                                         |
| Gong S et al, 2018         | No                                                       | Yes                                           | No                                                                                                  | No                                             | Yes                                                                          | Unclear                                                                                             | Yes                                                   | Yes                                         |
| Morillon AC et al, 2018    | Yes                                                      | Yes                                           | No                                                                                                  | Yes                                            | Yes                                                                          | Yes                                                                                                 | Yes                                                   | Yes                                         |

| Studies                    | Applicability concerns                                                          |                                                                                                         |                                                                                                                       |
|----------------------------|---------------------------------------------------------------------------------|---------------------------------------------------------------------------------------------------------|-----------------------------------------------------------------------------------------------------------------------|
|                            | Patient selection                                                               | Index test                                                                                              | Reference standard                                                                                                    |
|                            | Are there concerns that the included patients do not match the review question? | Are there concerns that the index test, its conduct, or interpretation differ from the review question? | Are there concerns that the target condition as defined by the reference standard does not match the review question? |
| Grandone E et al, 2006     | No                                                                              | No                                                                                                      | Yes                                                                                                                   |
| van Eijdsden M et al, 2008 | No                                                                              | No                                                                                                      | No                                                                                                                    |
| Horgan R et al, 2011       | No                                                                              | No                                                                                                      | No                                                                                                                    |
| Costet N et al, 2012       | No                                                                              | No                                                                                                      | No                                                                                                                    |
| Ertl R et al, 2012         | No                                                                              | No                                                                                                      | No                                                                                                                    |
| Gernand AD et al, 2013     | No                                                                              | No                                                                                                      | No                                                                                                                    |
| Sulek K et al, 2014        | No                                                                              | No                                                                                                      | Yes                                                                                                                   |
| Choi R et al, 2016         | Unclear                                                                         | No                                                                                                      | No                                                                                                                    |
| Kiely ME et al, 2016       | No                                                                              | No                                                                                                      | No                                                                                                                    |
| Ong YL et al, 2016         | No                                                                              | No                                                                                                      | No                                                                                                                    |
| Wang Y et al, 2016         | No                                                                              | No                                                                                                      | No                                                                                                                    |
| Delplancke TDJ et al, 2018 | No                                                                              | Unclear                                                                                                 | No                                                                                                                    |
| Luthra G et al, 2018       | No                                                                              | No                                                                                                      | No                                                                                                                    |
| Gong S et al, 2018         | Yes                                                                             | Yes                                                                                                     | No                                                                                                                    |
| Morillon AC et al, 2018    | No                                                                              | No                                                                                                      | No                                                                                                                    |
